# Supplementary material
Source: publisher figshare collection journal article supplement (https://tandf.figshare.com/ndownloader/files/20392542)
Supplement: Supplementary file 1 [file 20392542]

**Online Supplementary Material**

**Figure S1**


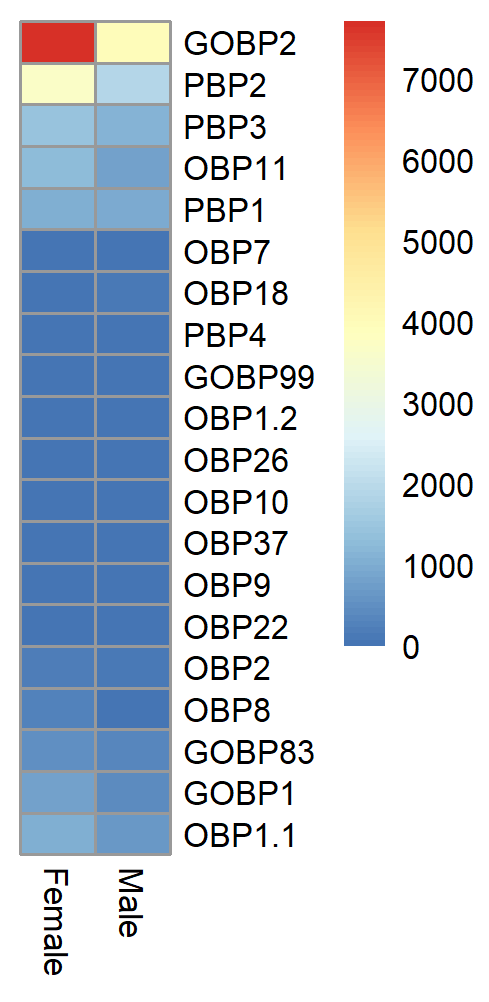


**Figure S1.** Heatmap of transcript abundance (FPKM) for OBPs calculated from the head transcriptome of *Galleria mellonella*.

**Figure S2.**

| **(A)** |
| --- |
| 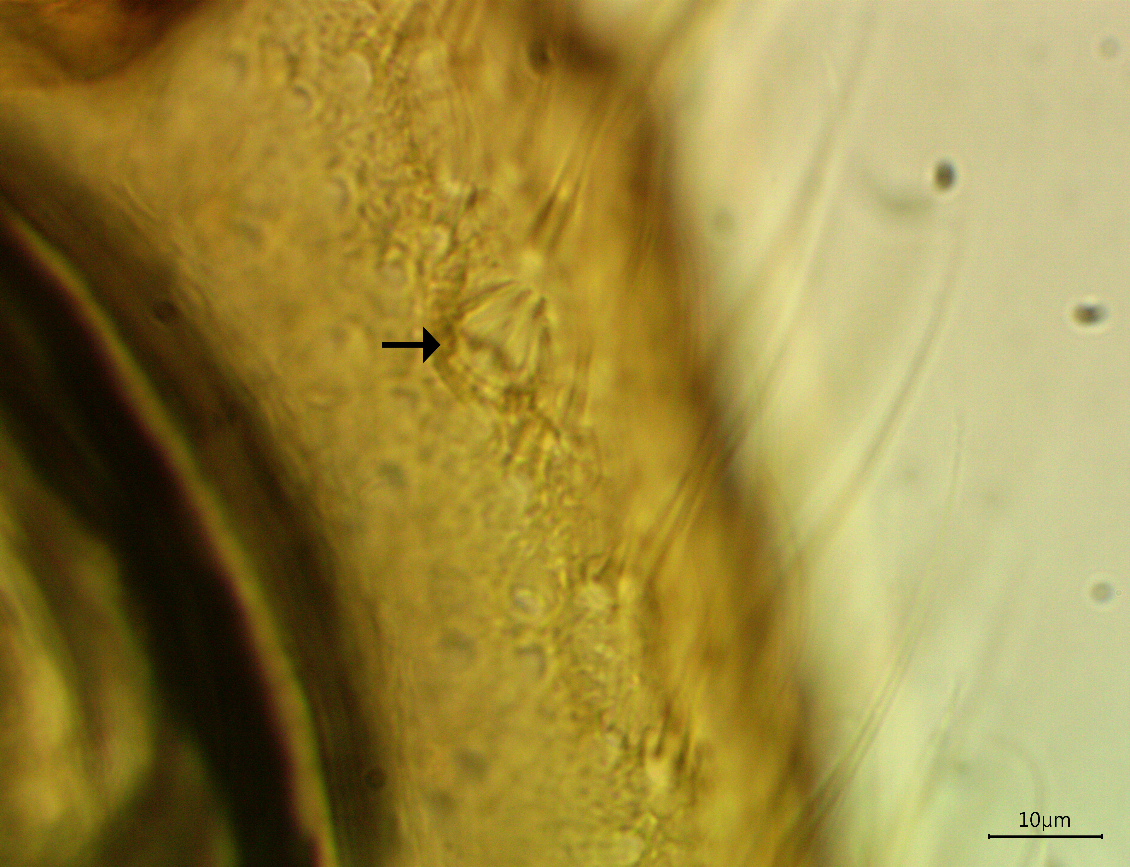 |
| **(B)** |
| 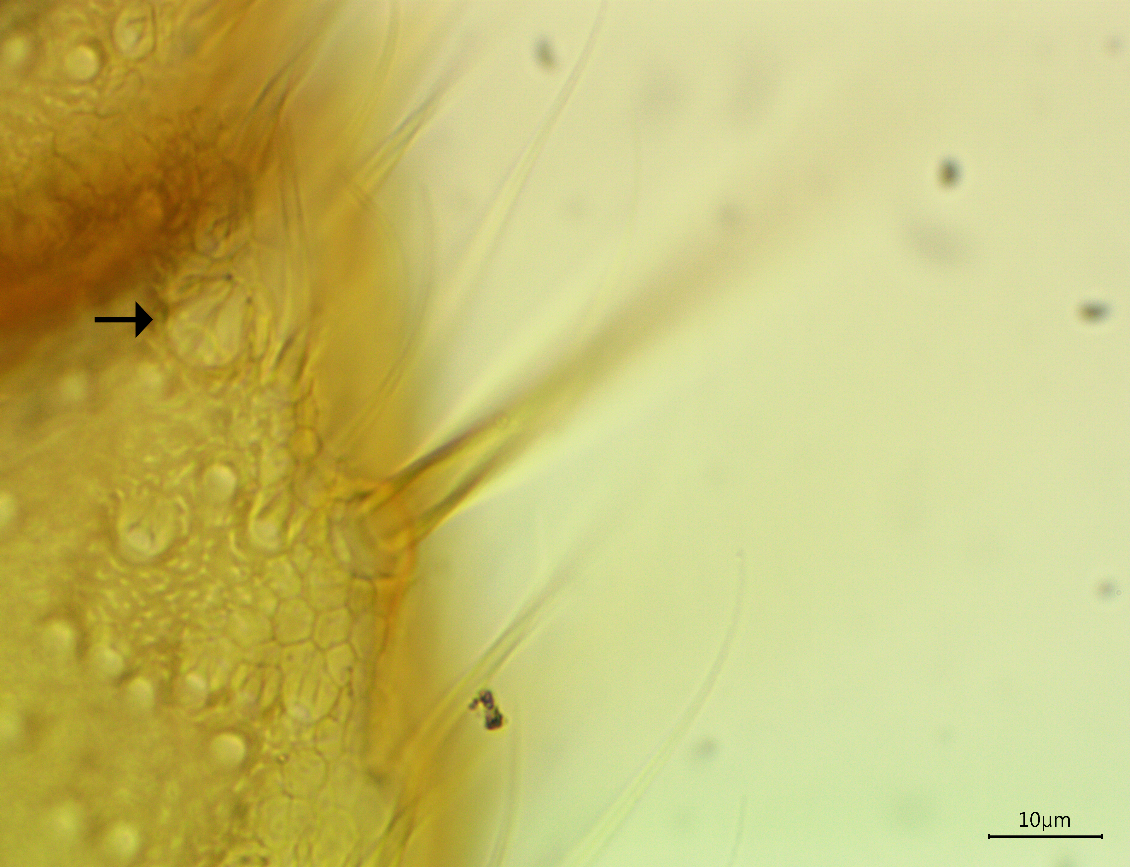 |

**Figure S2.** (A) SCO in female antennae with *in situ* hybridization. (B) SCO in control female antennae. Black arrows indicate the types of sensilla. Scale bar = 50 µm.

**Figure S3.**

| **(A)** |
| --- |
| 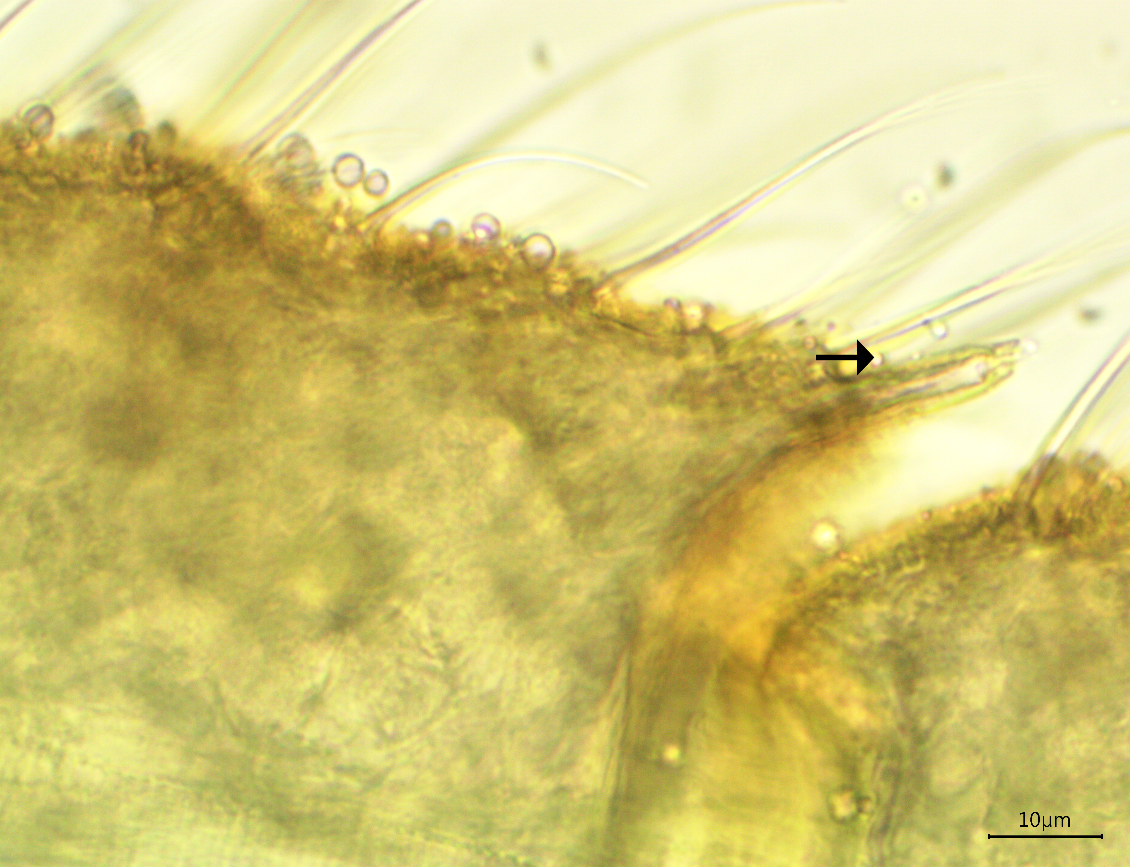 |
| **(B)** |
| 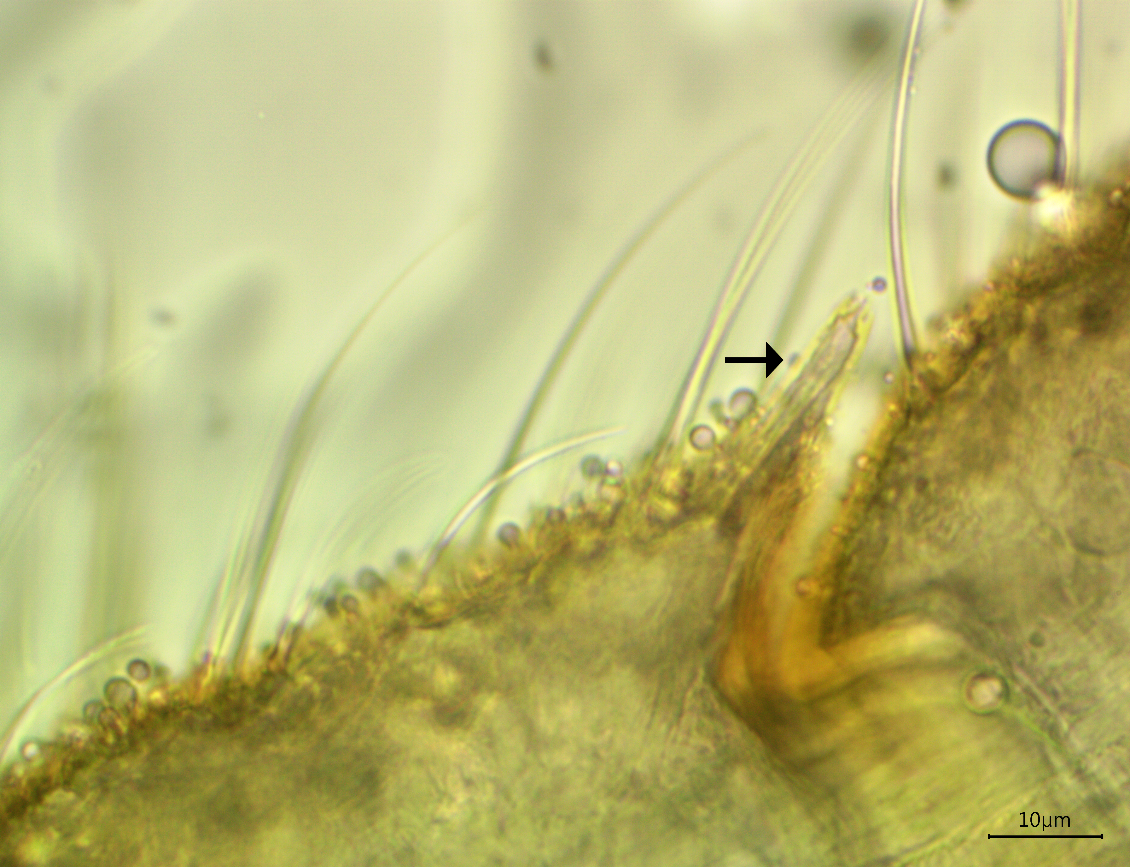 |

**Figure S3.** (A) STY in male antenna with *in situ* hybridization. (B) STY in control male antenna. Black arrows indicate the type of sensilla. Scale bar = 50 µm.
